# Supplementary material for: Site effects in controlling the chemical reactivity in crystals: solid-state photochromism of N-(n-propyl)nitrospiropyrane.
Source: Royal Society of Chemistry journal article supplement (doi:10.1039/b102121b), 2001-10-02
Supplement: b102121b.doc [file b102121b.doc]

Time decay of the merocyanine absorption. The spectrum is the difference in the IR absorption before and after irradiation of crystals of 1’-(n-propyl)-3’,3’-dimethyl-6-nitrospiro[2H-[1]benzopyran-2,2’-indoline]


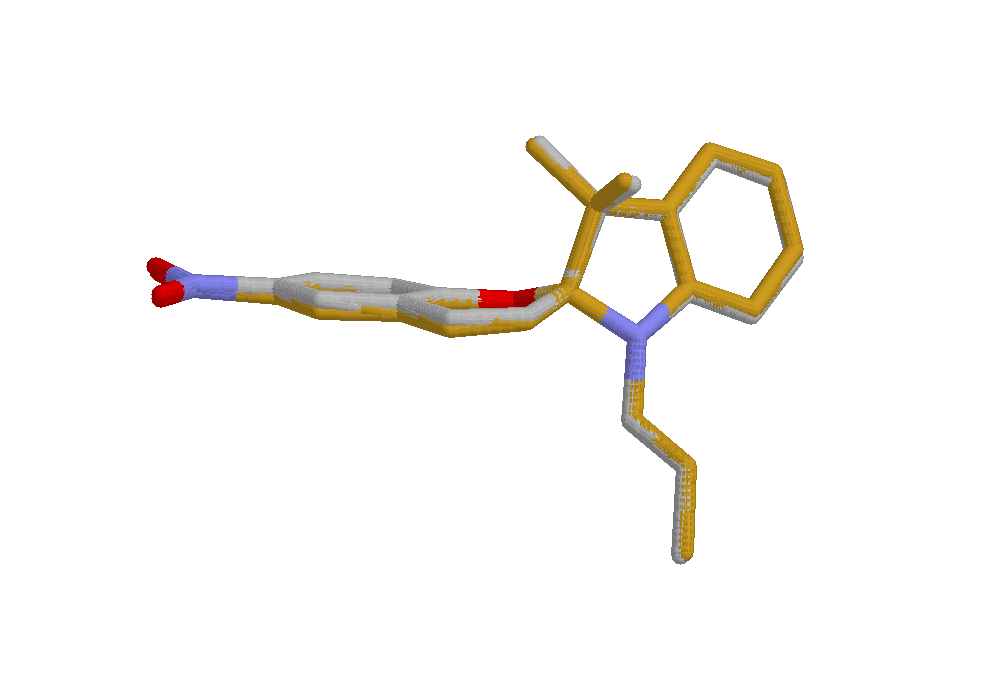


Overlay of the molecules 1(A) and 1(B) in the crystal. The molecules were treated as rigid bodies and the overlap between them was maximized.

The ratio between the effective volume of the two sites as a function of the radius of the rigid sphere in the Monte Carlo calculation.
